# Supplementary material for: Annexin A2 promotes phagophore assembly by enhancing Atg16L+ vesicle biogenesis and homotypic fusion
Source: PubMed Central journal article supplement (PMC4299943; doi:10.1038/ncomms6856), 2015-01-19
Supplement: NIHMS642754-supplement-1.pdf [file NIHMS642754-supplement-1.pdf]

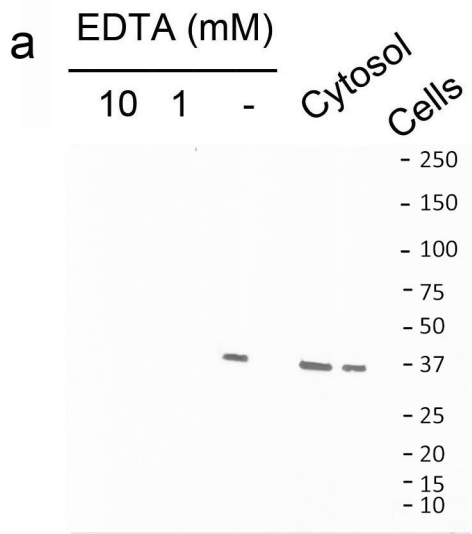

Annexin A2

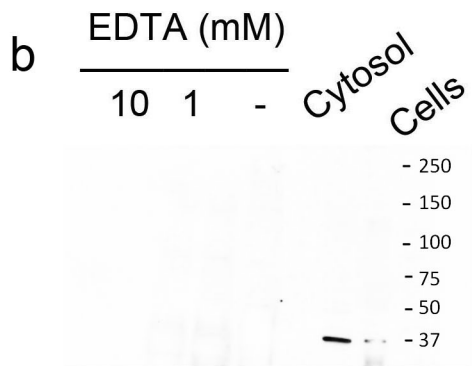

Annexin A 5

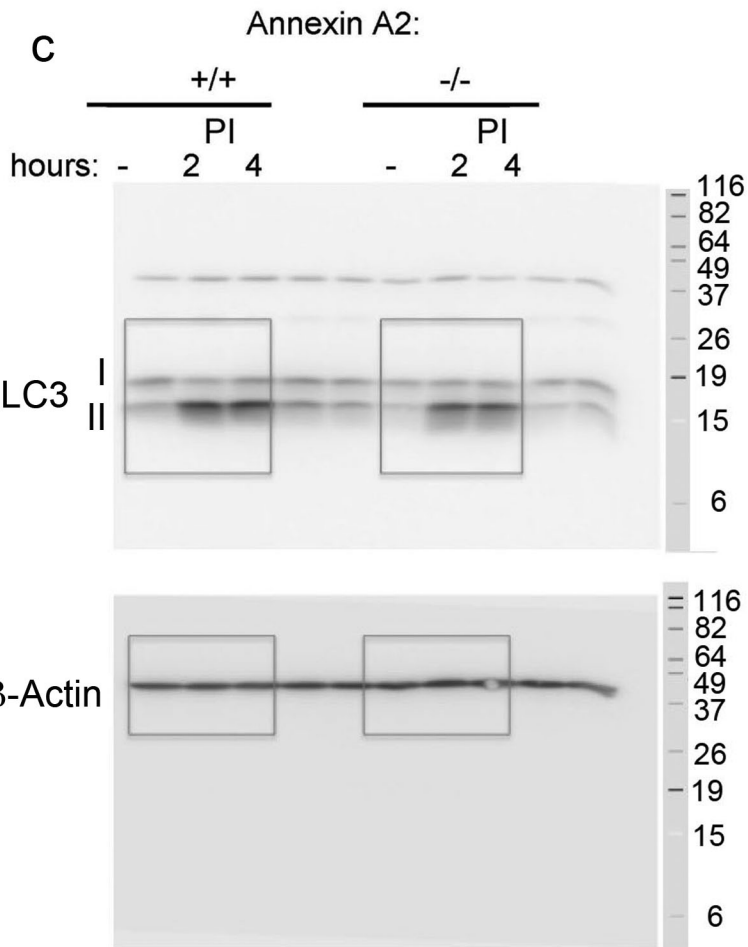

**Supplementary Figure 1. Western blots reported in Figures 1 and 5**  
**a)** western blot for Annexin A2 reported in Figure 1g. **b)** western blot for Annexin A5 reported in Figure 1g **c)** western blot for LC3 and beta-actin reported in Figure 5d.
